# Supplementary material for: A Simple and Reliable Liquid Chromatographic Method for Simultaneous Determination of Five Benzodiazepine Drugs in Human Plasma
Source: MDPI journal article supplement (doi:10.3390/analytica3020018), 2022-06-16
Supplement: s1 [file s1]

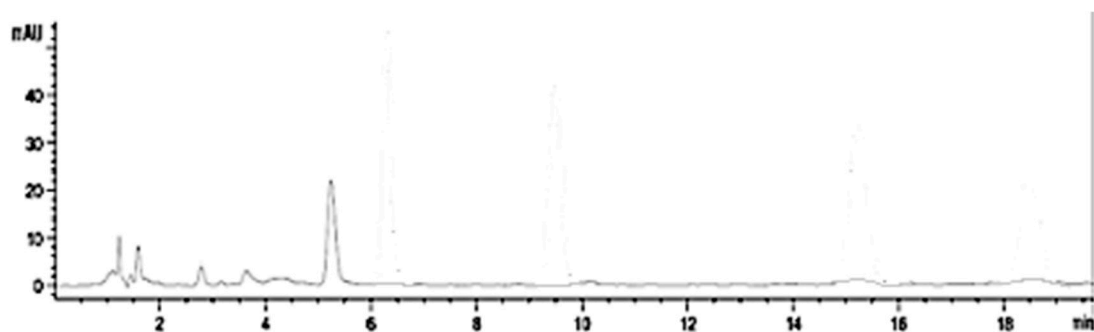

Figure S1. Chromatogram of bromazepam

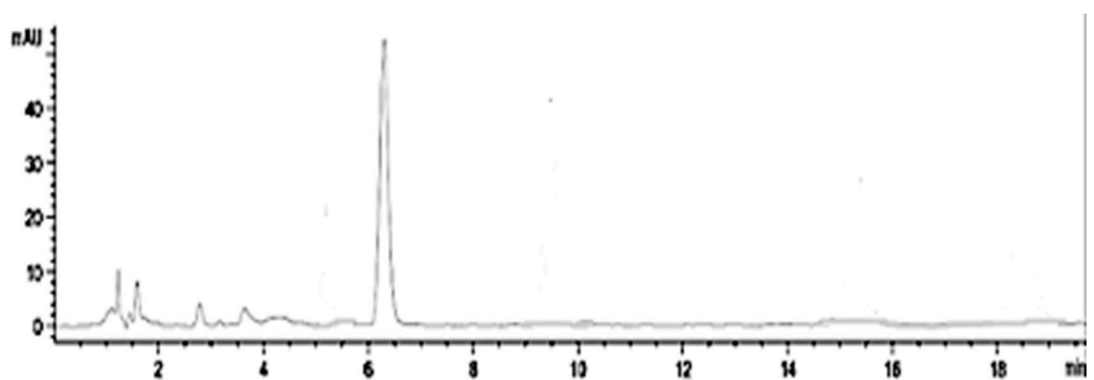

Figure S2. Chromatogram of clonazepam

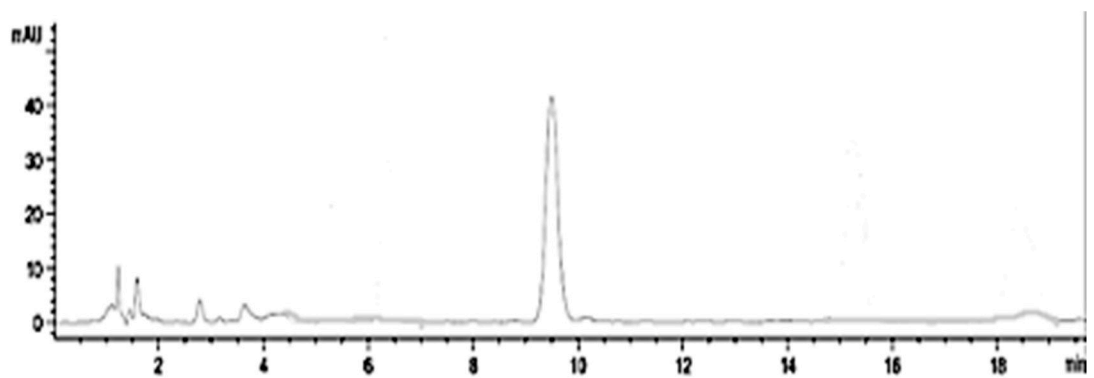

Figure S3. Chromatogram of lorazepam

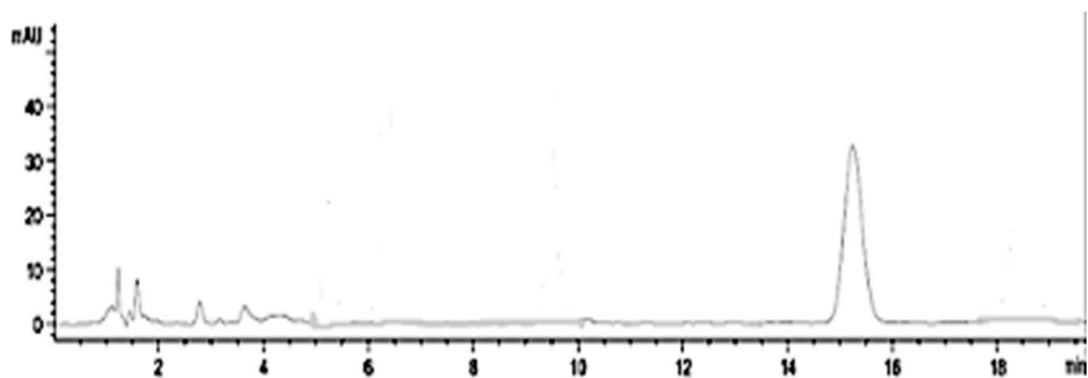

**Figure S4. Chromatogram of nordiazepam**

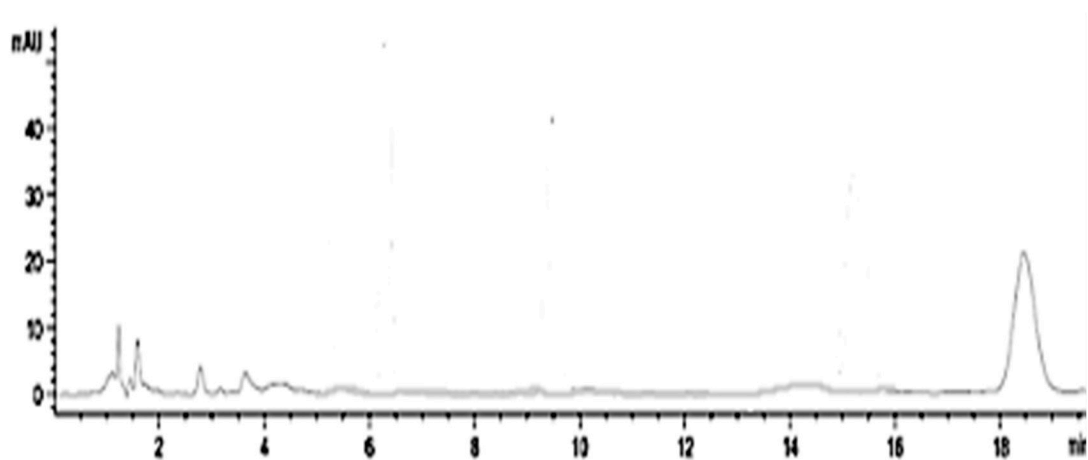

**Figure S5. Chromatogram of diazepam**

All chromatograms achieved under the optimum conditions of mobile phase containing 50% of 20 mmol L<sup>-1</sup> phosphate buffer at pH = 7 and 50% methanol, flow rate at 1.0 ml min<sup>-1</sup>, wavelength at 214 nm and 40 °C column temperature.

**Table S1.** Short and long term storage recoveries (%) and RSD

| analytes    | Storage time | Recovery % | RSD   |
|-------------|--------------|------------|-------|
| Bromazepam  | Short        | 98.8       | 0.219 |
|             | Long         | 99.7       | 0.374 |
| Clonazepam  | Short        | 99.4       | 0.187 |
|             | Long         | 100.2      | 0.432 |
| Lorazepam   | Short        | 99.1       | 0.176 |
|             | Long         | 102.8      | 1.981 |
| Nordiazepam | Short        | 100.2      | 0.543 |
|             | Long         | 103.1      | 1.572 |
| Diazepam    | Short        | 99.8       | 0.441 |
|             | Long         | 100.1      | 0.518 |
